# Supplementary material for: Potent EGFR/PARP-1 inhibition by spirooxindole-triazole hybrids for targeted liver cancer therapy
Source: Royal Society of Chemistry journal article supplement (doi:10.1039/d4ra05966b), 2025-01-01
Supplement: d4ra05966b1.pdf [file d4ra05966b1.pdf]

# SUPPORTING INFORMATION

## Potent EGFR/PARP-1 Inhibition by Spirooxindole-Triazole Hybrids for Targeted Liver Cancer Therapy

**Mohamed S. Nafie**<sup>1,2</sup>, **M. Ali**<sup>3</sup>, **Moayad Abdullah Alwehaibi**<sup>3</sup>, **Abdulmajeed Abdullah Alayyaf**<sup>3</sup>, **Muhanna K. Al-Muhanna**,<sup>4</sup> **Naif S. Almuqati**,<sup>5</sup> **Abdullah A. Alghamdi**,<sup>5</sup> **Matti Haukka**<sup>6</sup>, **Syeda Sumayya Tariq**<sup>7</sup>, **Zaheer Ul-Haq**<sup>7</sup> and **Assem Barakat**<sup>3,\*</sup>

<sup>1</sup> Department of Chemistry, College of Sciences, University of Sharjah, Sharjah (P.O. 27272), United Arab Emirates (UAE); mohamed.elsayed@sharjah.ac.ae

<sup>2</sup> Chemistry Department, Faculty of Science, Suez Canal University, Ismailia, (P.O. 41522), Egypt; mohamed\_nafie@science.suez.edu.eg

<sup>3</sup> Department of Chemistry, College of Science, King Saud University, P. O. Box 2455, Riyadh 11451, Saudi Arabia. mayyaf@ksu.edu.sa (A.A.A.); Maly.c@ksu.edu.sa(M.A.); 442105720@student.ksu.edu.sa (M.A.A.).

<sup>4</sup> The Material Science Research Institute, King Abdulaziz City for Science and Technology (KACST), Riyadh 11442, Saudi Arabia; mmuhanna@kacst.edu.sa (M.K.A-M.).

<sup>5</sup> Refining and Petrochemical Technologies Institute (RPTI), KACST

<sup>6</sup> Department of Chemistry, University of Jyväskylä, P.O. Box 35, FI-40014 Jyväskylä, Finland; matti.o.haukka@jyu.fi (M.H.).

<sup>7</sup> Dr. Panjwani Center for Molecular medicine and Drug Research, International Center for Chemical and Biological Sciences, University of Karachi, Karachi-75270, Pakistan. sumayyatariq7@gmail.com (S.S.T.); zaheer\_qasmi@hotmail.com (Z.U.-H.).

\* Correspondence: ambarakat@ksu.edu.sa (A.B.)

## X-Ray structure determinations

The crystals of **acetyl-triazole derivative**, **1a**, and **1b** were immersed in cryo-oil, mounted in a loop, and measured at a temperature of 120-121 K. The X-ray diffraction data were collected on a Rigaku Oxford Diffraction Supernova diffractometer using Cu K $\alpha$  radiation (**acetyl-triazole derivative** and **1b**) or Mo K $\alpha$  radiation (**1a**). The *CrysAlisPro*<sup>1</sup> software package was used for cell refinements and data reductions. A multi-scan (**acetyl-triazole derivative** and **1a**) or an analytical (**1b**) absorption correction (*CrysAlisPro*<sup>1</sup>) was applied to the intensities before the structure solutions. The structures were solved by the intrinsic phasing (*SHELXT*<sup>2</sup>) method. Structural refinements were carried out using *SHELXL*<sup>3</sup> software with *SHELXLE*<sup>4</sup> graphical user interface. All hydrogen atoms were positioned geometrically and constrained to ride on their parent atoms, with C-H = 0.95-0.99 Å and  $U_{\text{iso}} = 1.2-1.5 \cdot U_{\text{eq}}(\text{parent atom})$ . The crystallographic details are summarized in Table S1.

**Table S1.** Crystal Data of **acetyl-triazole derivative**, **1a**, and **1b**.

|                            | <b>acetyl-triazole derivative</b>                               | <b>1a</b>                                                                     | <b>1b</b>                                                         |
|----------------------------|-----------------------------------------------------------------|-------------------------------------------------------------------------------|-------------------------------------------------------------------|
| CCDC                       | 2360616                                                         | 2360617                                                                       | 2360618                                                           |
| empirical formula          | C <sub>11</sub> H <sub>8</sub> Cl <sub>3</sub> N <sub>3</sub> O | C <sub>20</sub> H <sub>12</sub> Cl <sub>3</sub> N <sub>3</sub> O <sub>2</sub> | C <sub>20</sub> H <sub>12</sub> Cl <sub>3</sub> N <sub>3</sub> OS |
| fw                         | 304.55                                                          | 432.68                                                                        | 448.74                                                            |
| temp (K)                   | 121(2)                                                          | 120(2)                                                                        | 120(2) K                                                          |
| $\lambda$ (Å)              | 1.54184                                                         | 0.71073                                                                       | 1.54184 Å                                                         |
| cryst syst                 | Monoclinic                                                      | Monoclinic                                                                    | Monoclinic                                                        |
| space group                | <i>P2<sub>1</sub>/n</i>                                         | <i>P2<sub>1</sub></i>                                                         | <i>I2/a</i>                                                       |
| <i>a</i> (Å)               | 10.62874(18)                                                    | 7.66680(10)                                                                   | 25.8395(3)                                                        |
| <i>b</i> (Å)               | 10.43514(18)                                                    | 13.8977(2)                                                                    | 7.12869(6)                                                        |
| <i>c</i> (Å)               | 11.62031(19)                                                    | 9.5441(2)                                                                     | 23.3863(2)                                                        |
| $\alpha$ (deg)             |                                                                 |                                                                               |                                                                   |
| $\beta$ (deg)              | 93.7149(15)                                                     | 111.742(2)                                                                    | 114.7797(13)                                                      |
| $\gamma$ (deg)             |                                                                 |                                                                               |                                                                   |
| <i>V</i> (Å <sup>3</sup> ) | 1286.13(4)                                                      | 944.59(3)                                                                     | 3911.17(8)                                                        |
| Z                          | 4                                                               | 2                                                                             | 8                                                                 |

|                                            |           |            |        |
|--------------------------------------------|-----------|------------|--------|
| $\rho_{\text{calc}}$ (Mg/m <sup>3</sup> )  | 1.573     | 1.521      | 1.524  |
| $\mu$ (Mo K $\alpha$ ) (mm <sup>-1</sup> ) | 6.387     | 0.507      | 5.383  |
| No. reflns.                                | 16383     | 19035      | 63498  |
| Unique reflns.                             | 2740      | 9361       | 4221   |
| Completeness<br>$\theta=67.684^\circ$      | to 100 %  |            | 100 %  |
| Completeness<br>$\theta=25.242^\circ$      | to        | 100 %      |        |
| Absolute<br>parameter                      | structure | -0.019(18) |        |
| GOOF (F <sup>2</sup> )                     | 1.072     | 1.033      | 1.098  |
| R <sub>int</sub>                           | 0.0343    | 0.0270     | 0.0333 |
| R1 <sup>a</sup> ( $I \geq 2\sigma$ )       | 0.0309    | 0.0373     | 0.0289 |
| wR2 <sup>b</sup> ( $I \geq 2\sigma$ )      | 0.0839    | 0.0772     | 0.0790 |

---


$$^a R_1 = \Sigma||F_o| - |F_c||/\Sigma|F_o|. \quad ^b wR_2 = \{\Sigma[w(F_o^2 - F_c^2)^2]/ \Sigma[w(F_o^2)^2]\}^{1/2}$$

## References

1. Rigaku Oxford Diffraction, *CrysAlisPro 1.171.43.100a*, 2023, Rigaku Oxford Diffraction inc., Yarnton, Oxfordshire, England.
2. Sheldrick, G. M. *Acta Cryst.* **2015**, *A71*, 3-8.
3. Sheldrick, G. M. *Acta Cryst.* **2015**, *C71*, 3-8.
4. Hübschle, C. B.; Sheldrick, G. M.; Dittrich, B. *J. Appl. Cryst.* **2011**, *44*, 1281-1284.

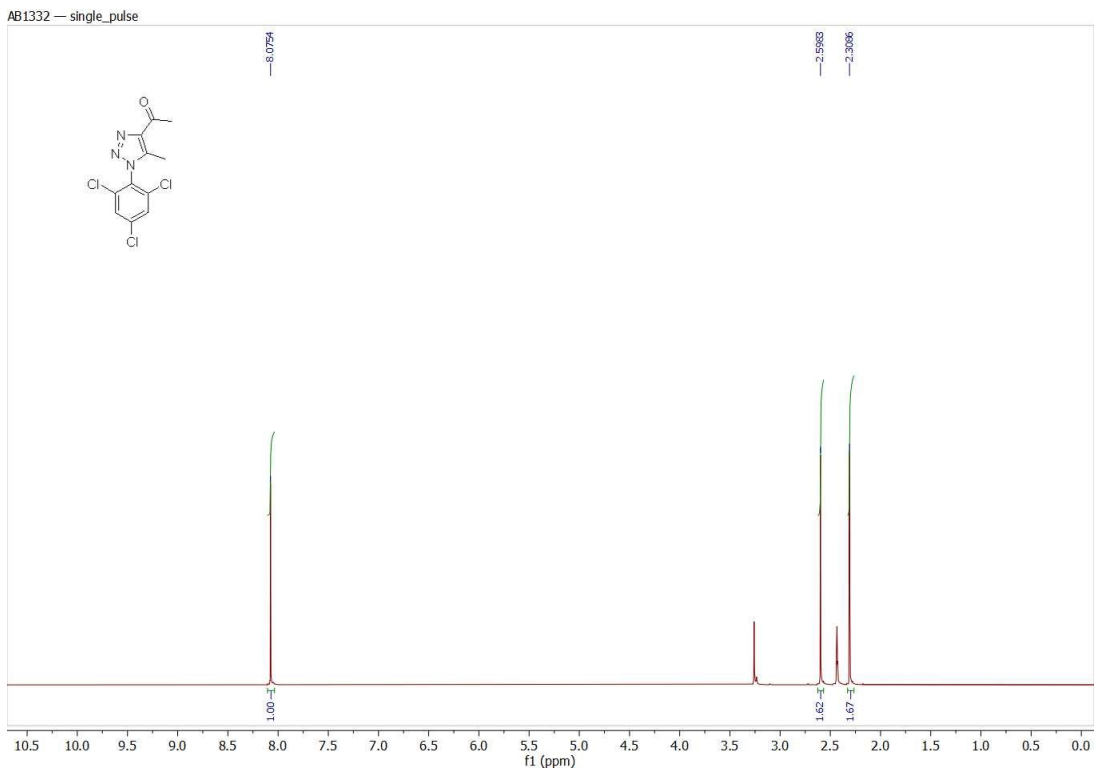

**Figure S1:**  $^1\text{H}$ NMR (DMSO- $d_6$ ) for acetyl-triazole derivative

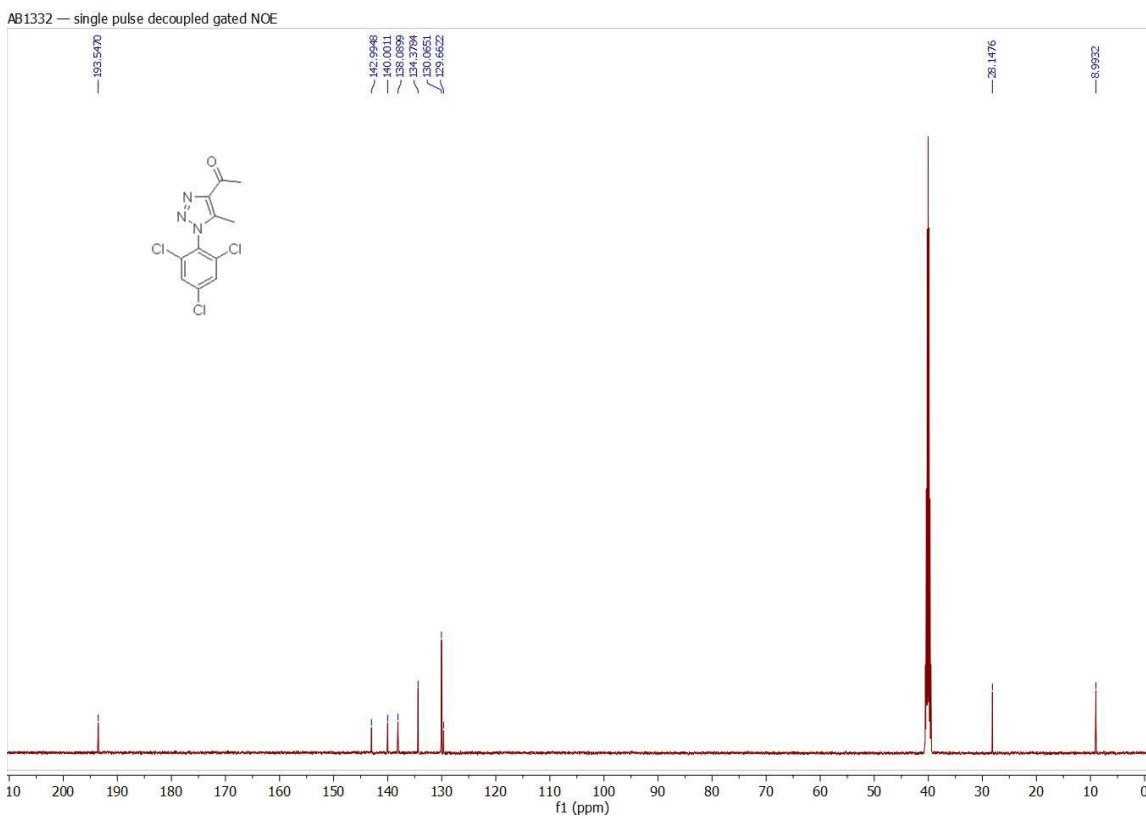

**Figure S2:**  $^{13}\text{C}$ NMR (DMSO- $d_6$ ) for acetyl-triazole derivative

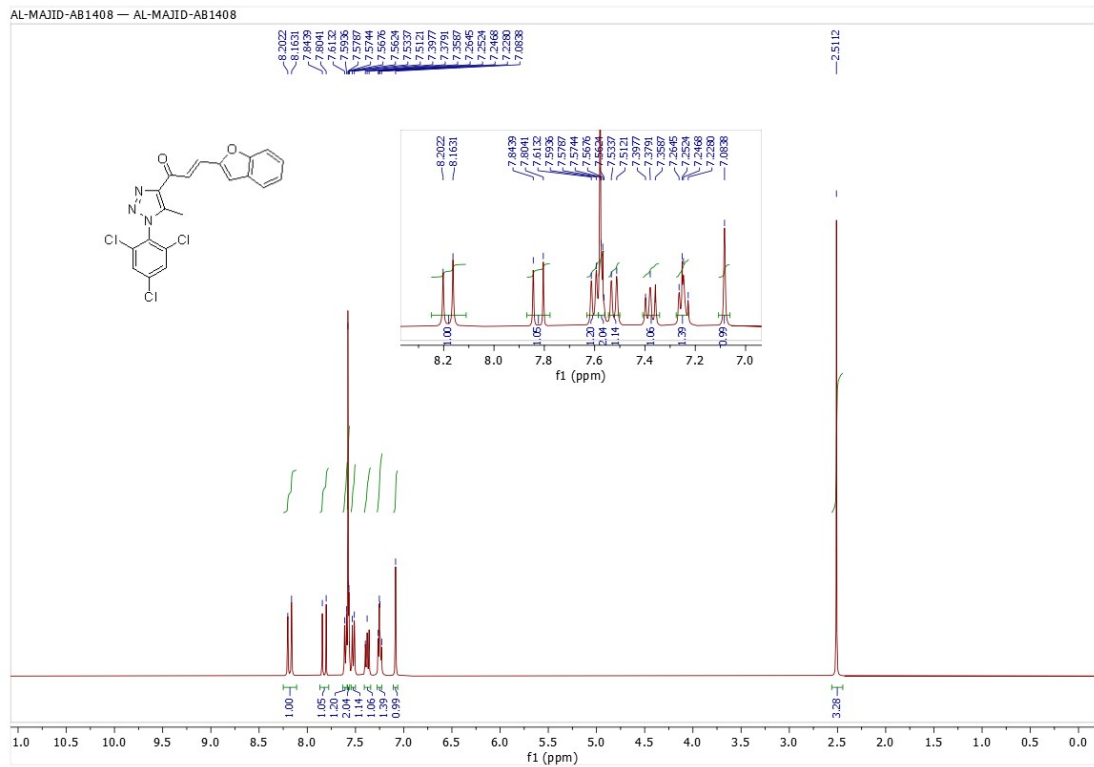

**Figure S3:** <sup>1</sup>H NMR (CDCl<sub>3</sub>) for **1a**

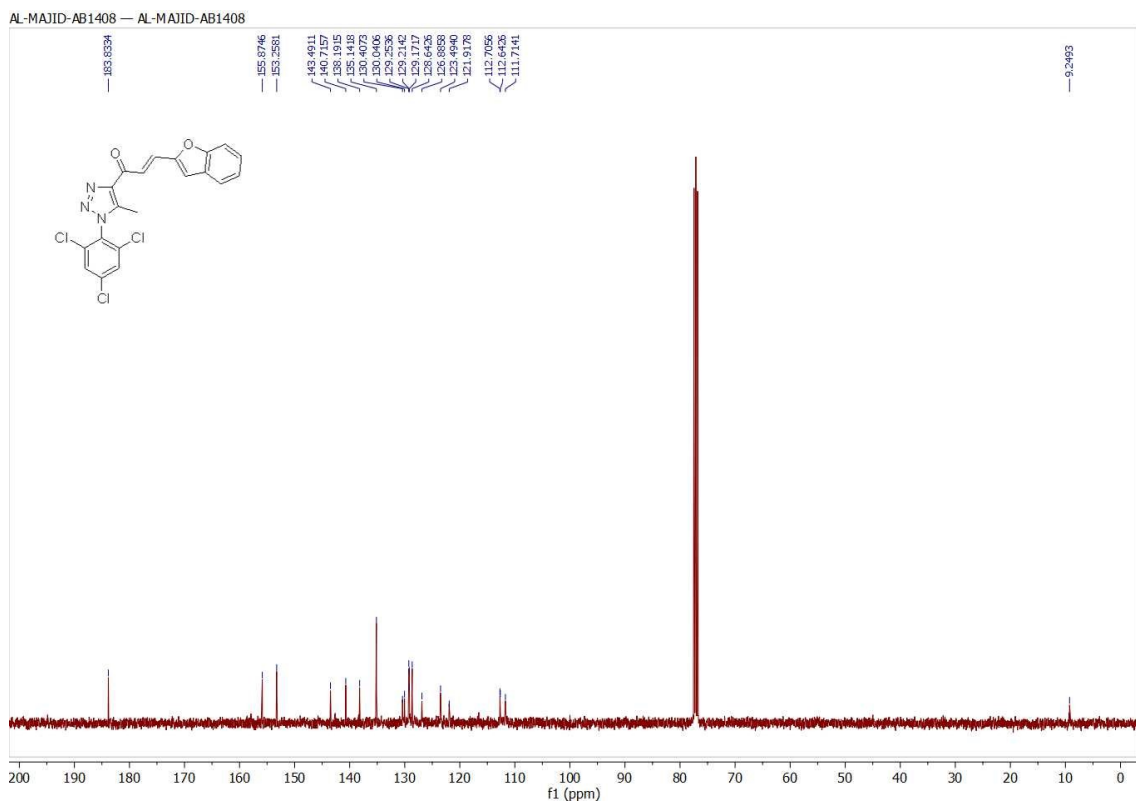

**Figure S4:** <sup>13</sup>C NMR (CDCl<sub>3</sub>) for **1a**



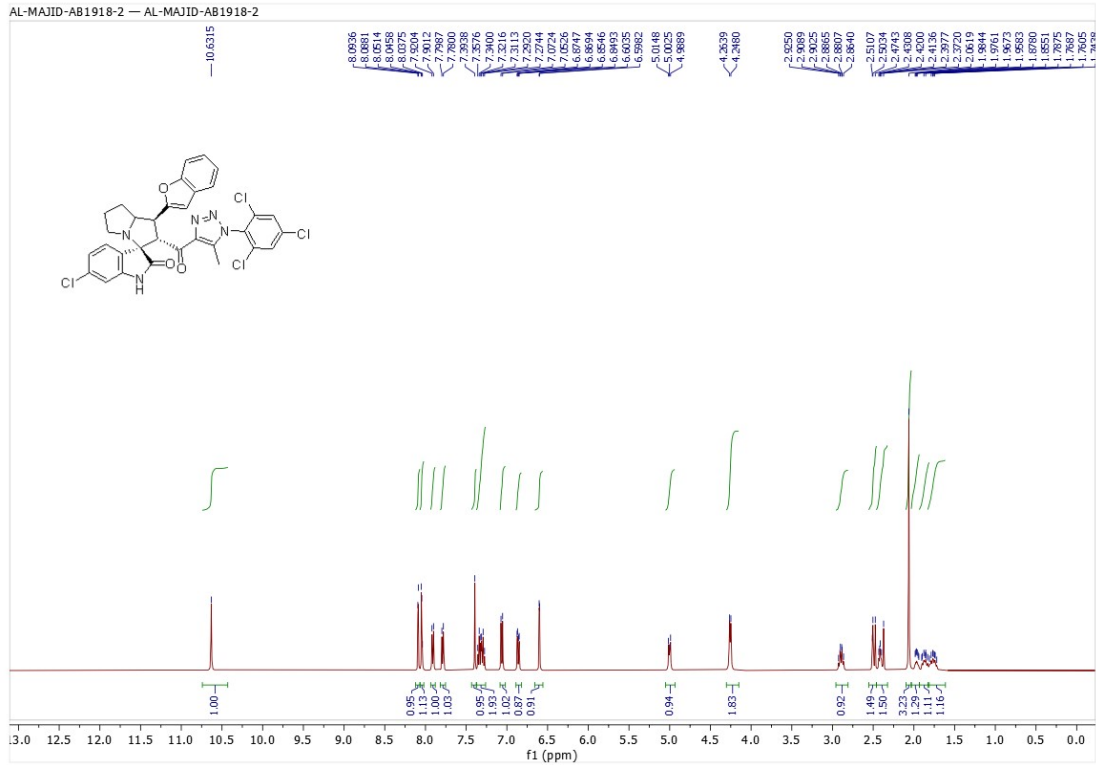

Figure S7:  $^1\text{H}$ NMR ( $\text{DMSO}-d_6$ ) for 4a

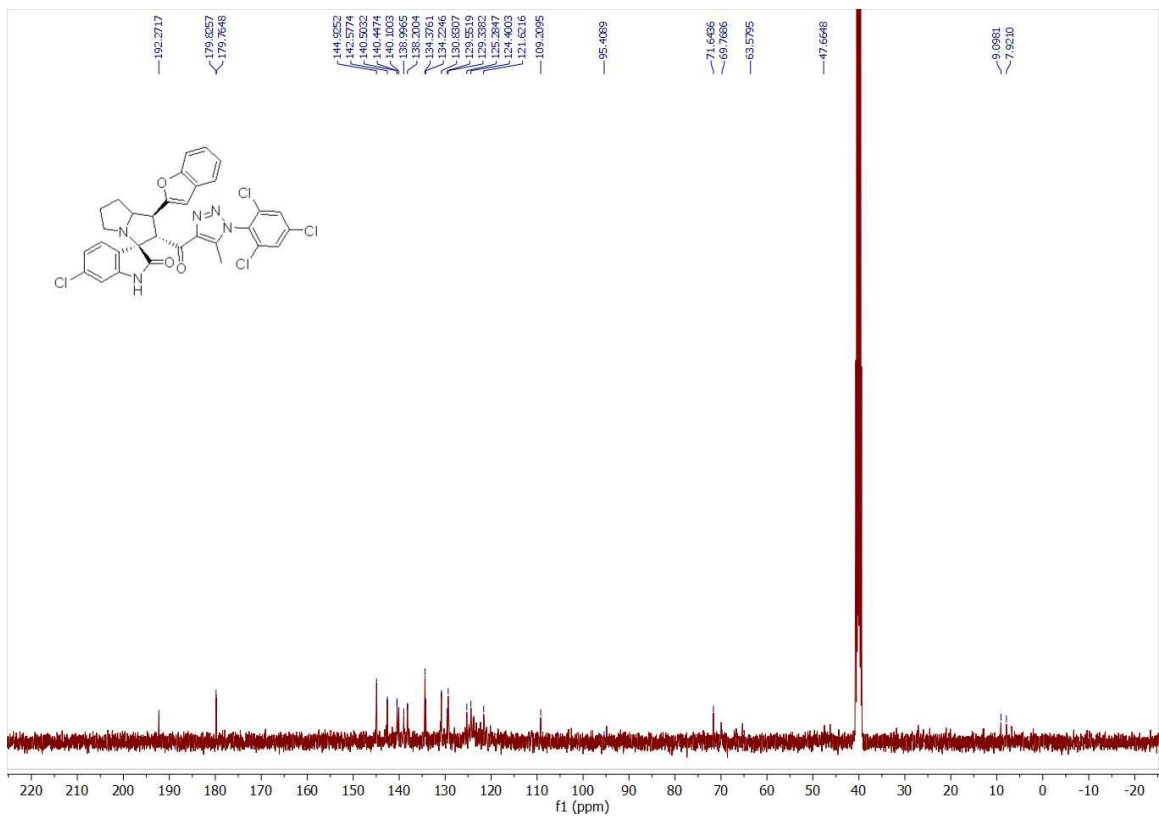

Figure S8:  $^{13}\text{C}$ NMR ( $\text{DMSO}-d_6$ ) for 4a

AL-MAJID-AB1419 — AL-MAJID-AB1419

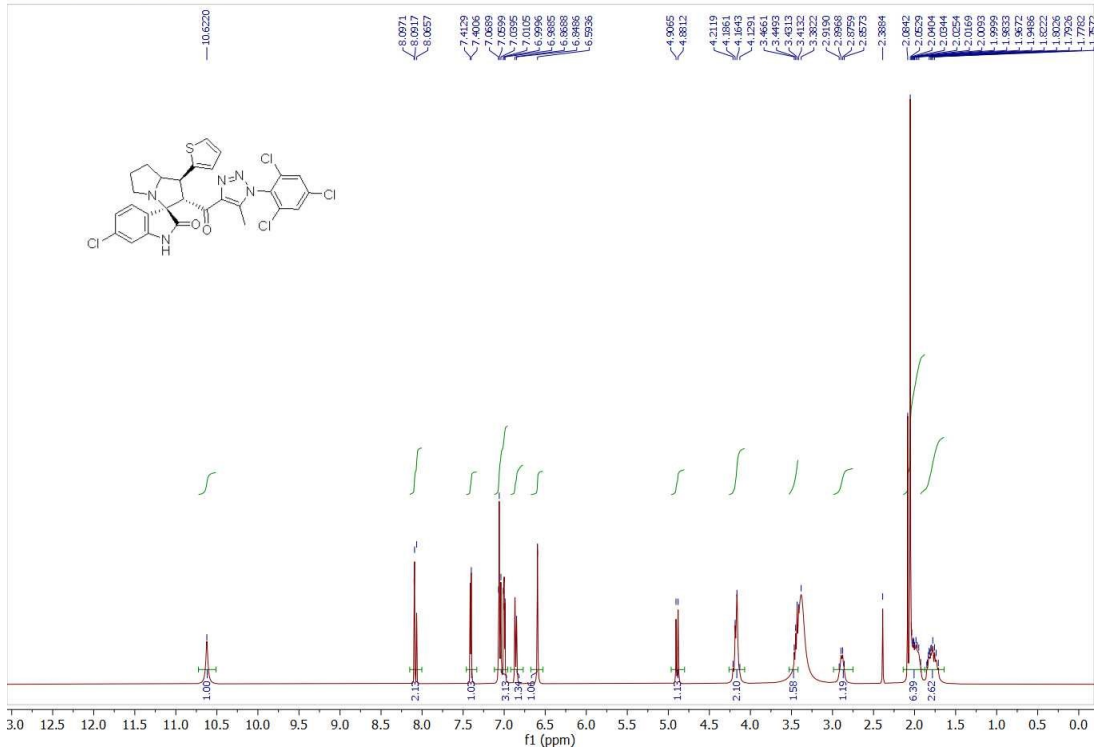

Figure S9: <sup>1</sup>H NMR (DMSO-*d*<sub>6</sub>) for 4c

AL-MAJID-AB1419 — AL-MAJID-AB1419

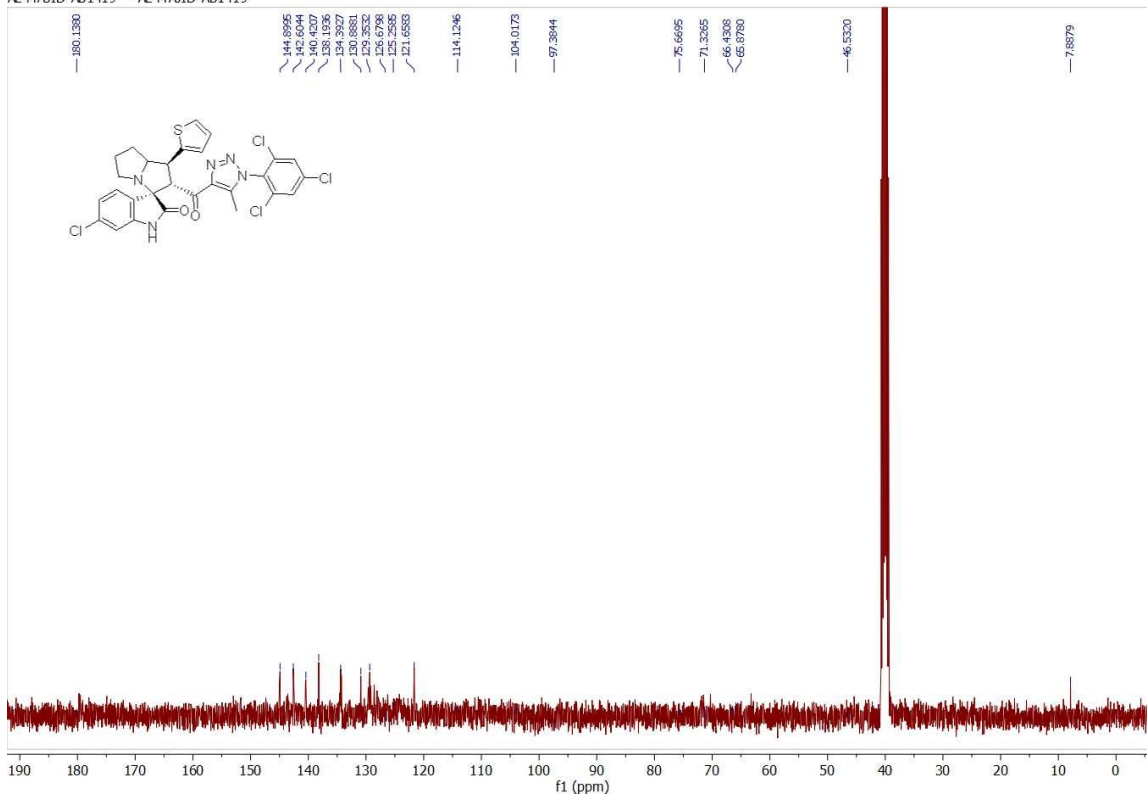

Figure S10: <sup>13</sup>C NMR (DMSO-*d*<sub>6</sub>) for 4c



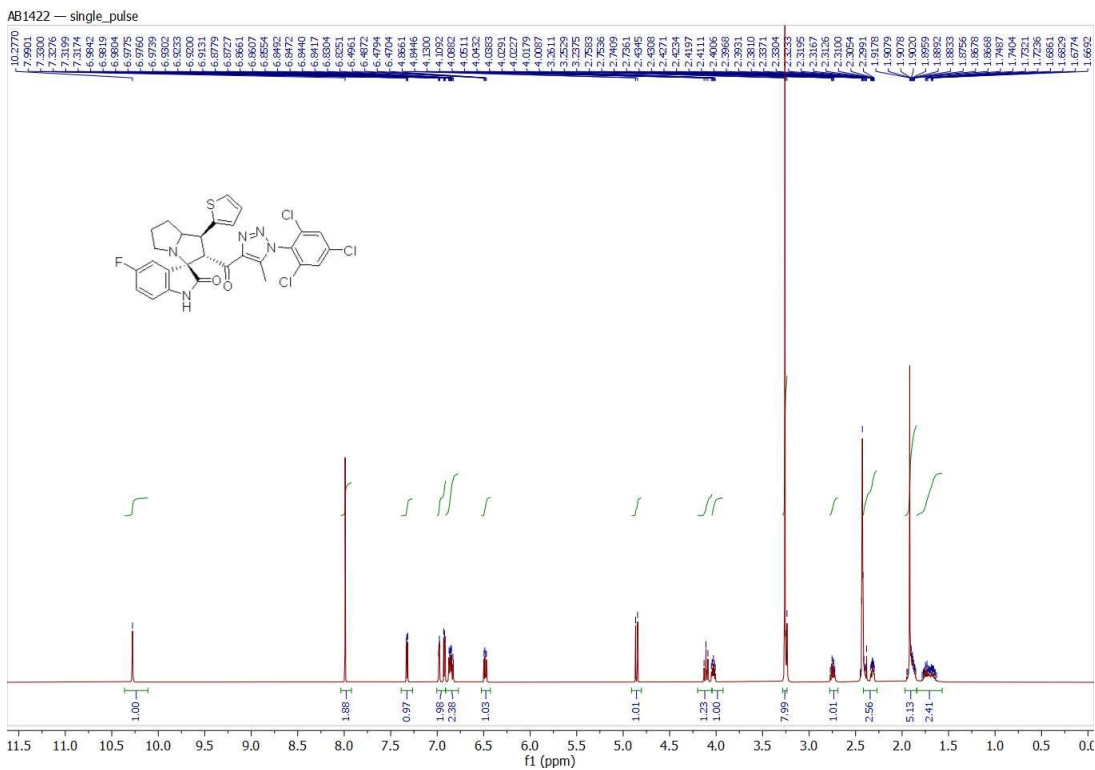

Figure S11:  $^1\text{H}$ NMR (DMSO- $d_6$ ) for 4d

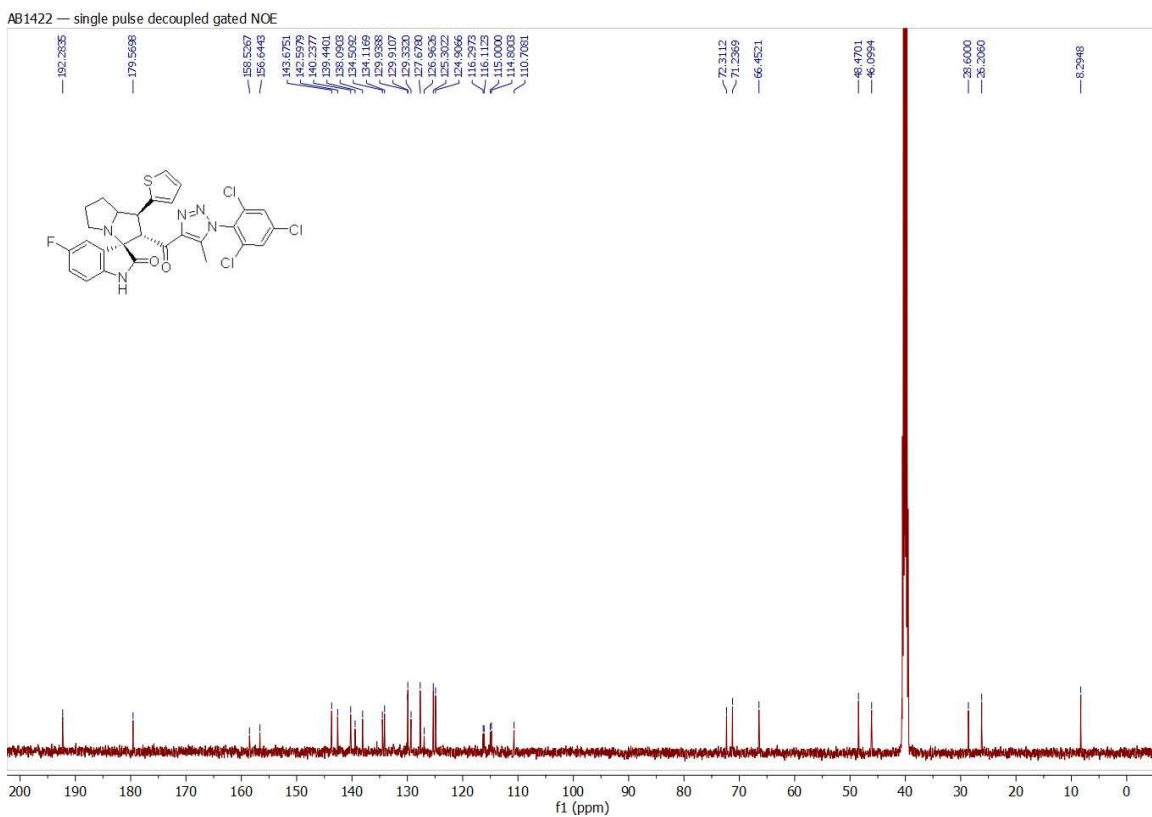

Figure S12:  $^{13}\text{C}$ NMR (DMSO- $d_6$ ) for 4d



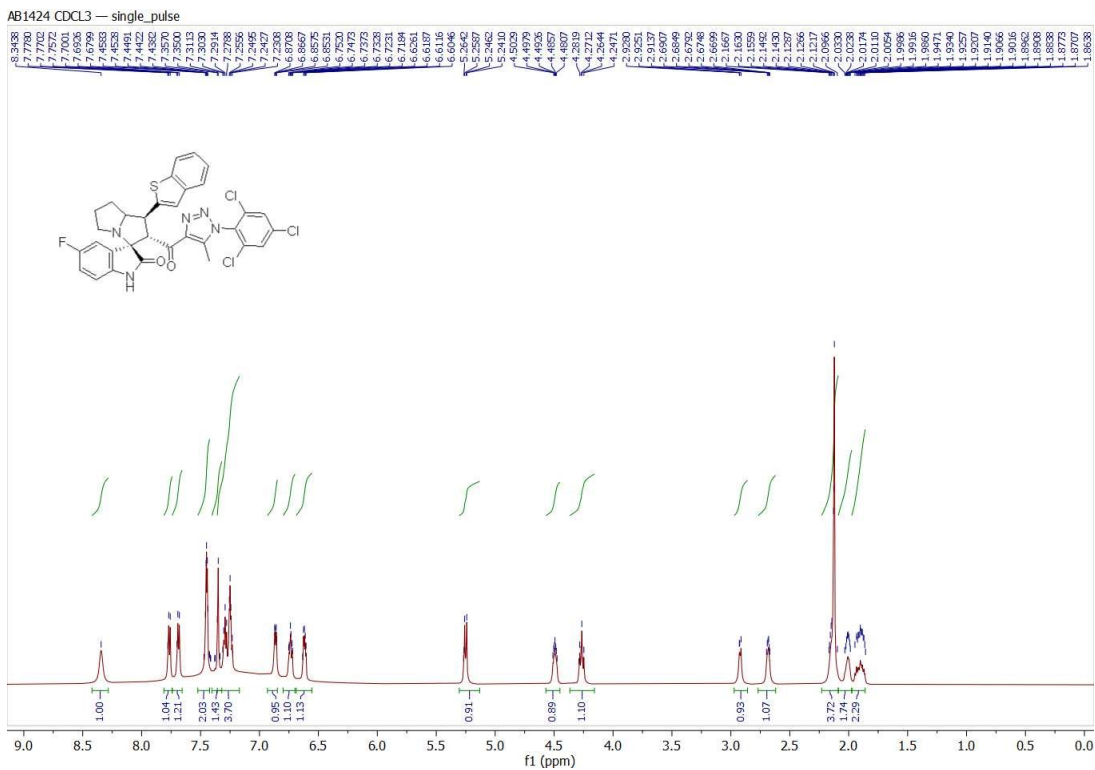

Figure S15: <sup>1</sup>H NMR (DMSO-*d*<sub>6</sub>) for 4f

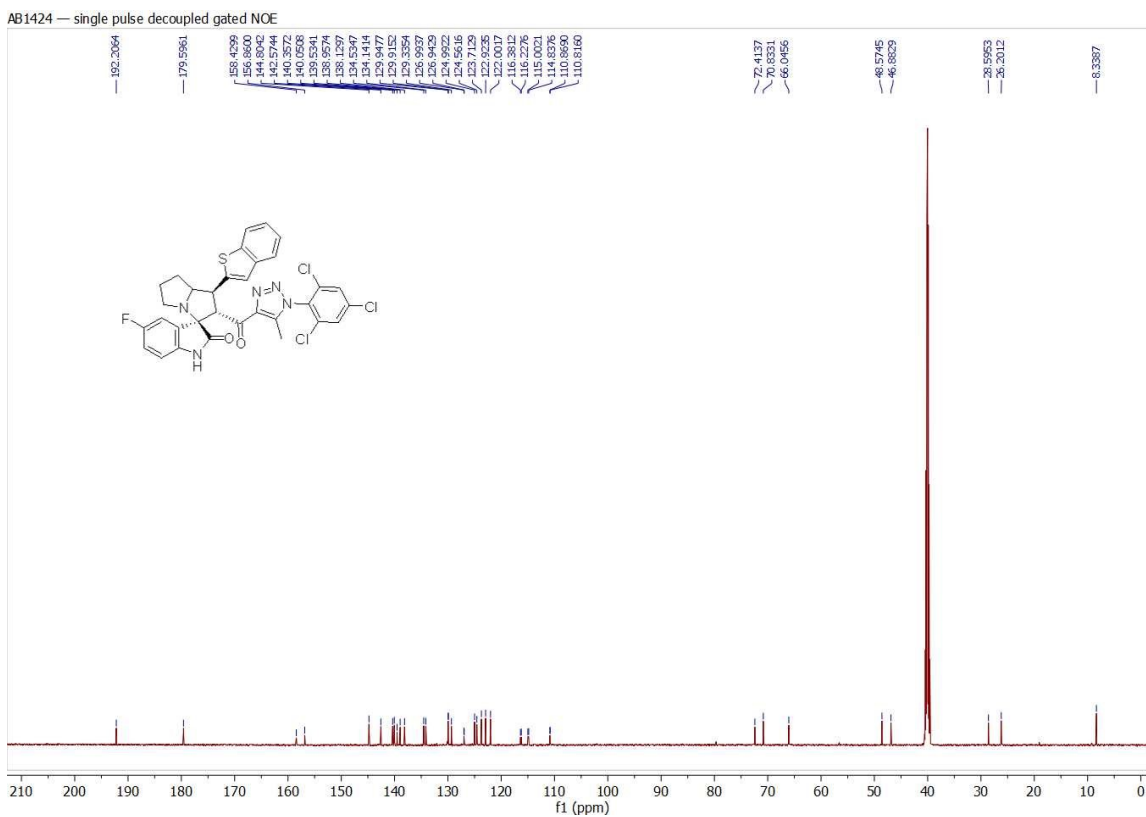

Figure S16: <sup>13</sup>C NMR (DMSO-*d*<sub>6</sub>) for 4f

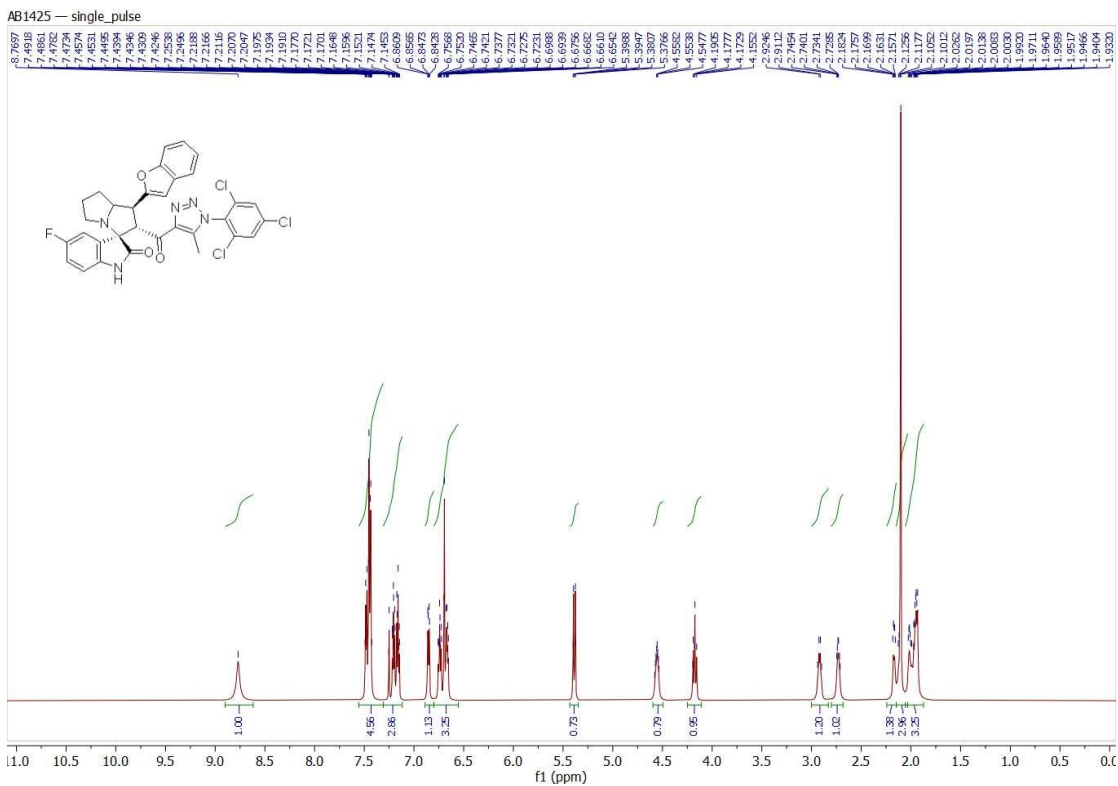

Figure S17:  $^1\text{H NMR}$  (CDCl<sub>3</sub>) for 4g

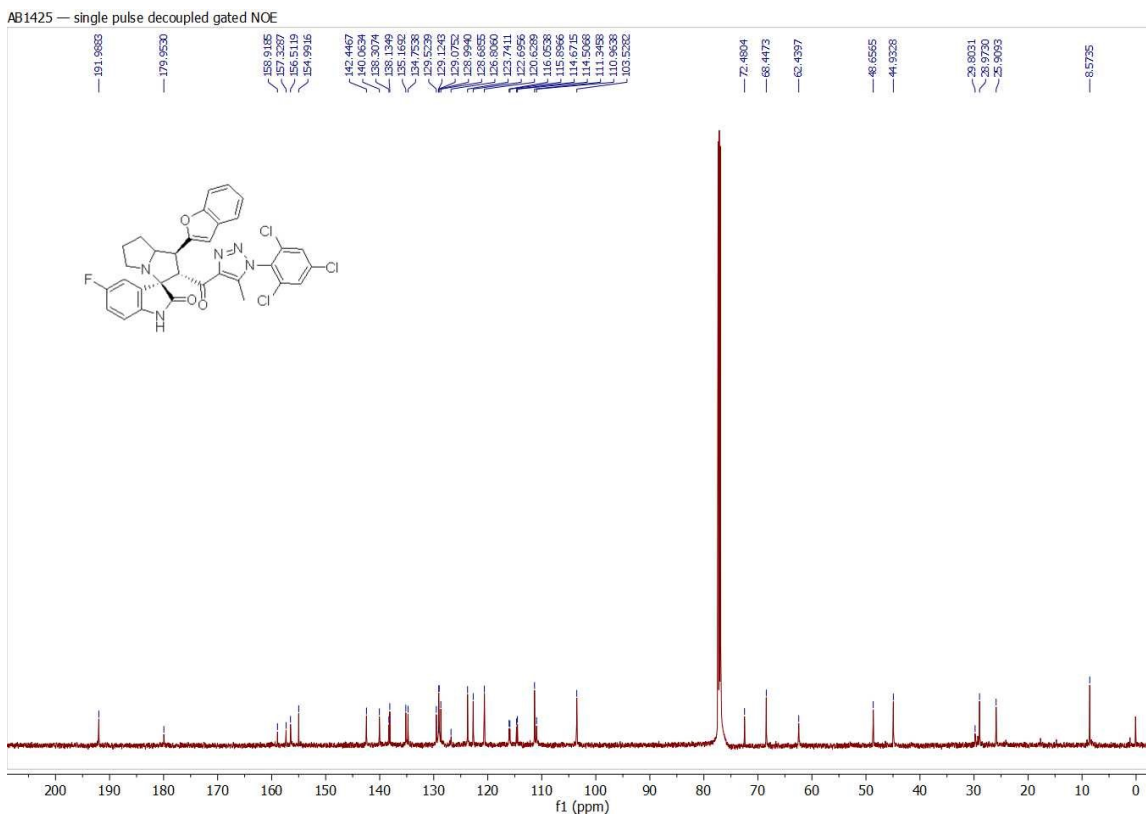

Figure S18:  $^{13}\text{C NMR}$  (CDCl<sub>3</sub>) for 4g

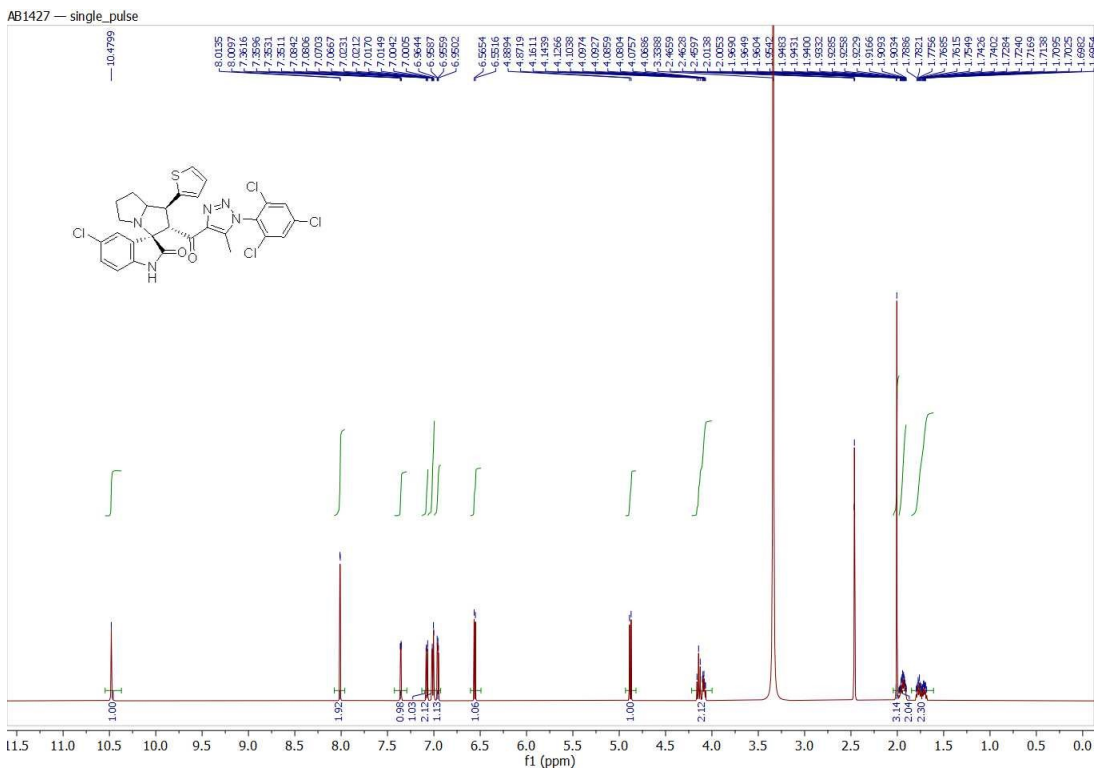

Figure S19:  $^1\text{H}$ NMR (DMSO- $d_6$ ) for 4i

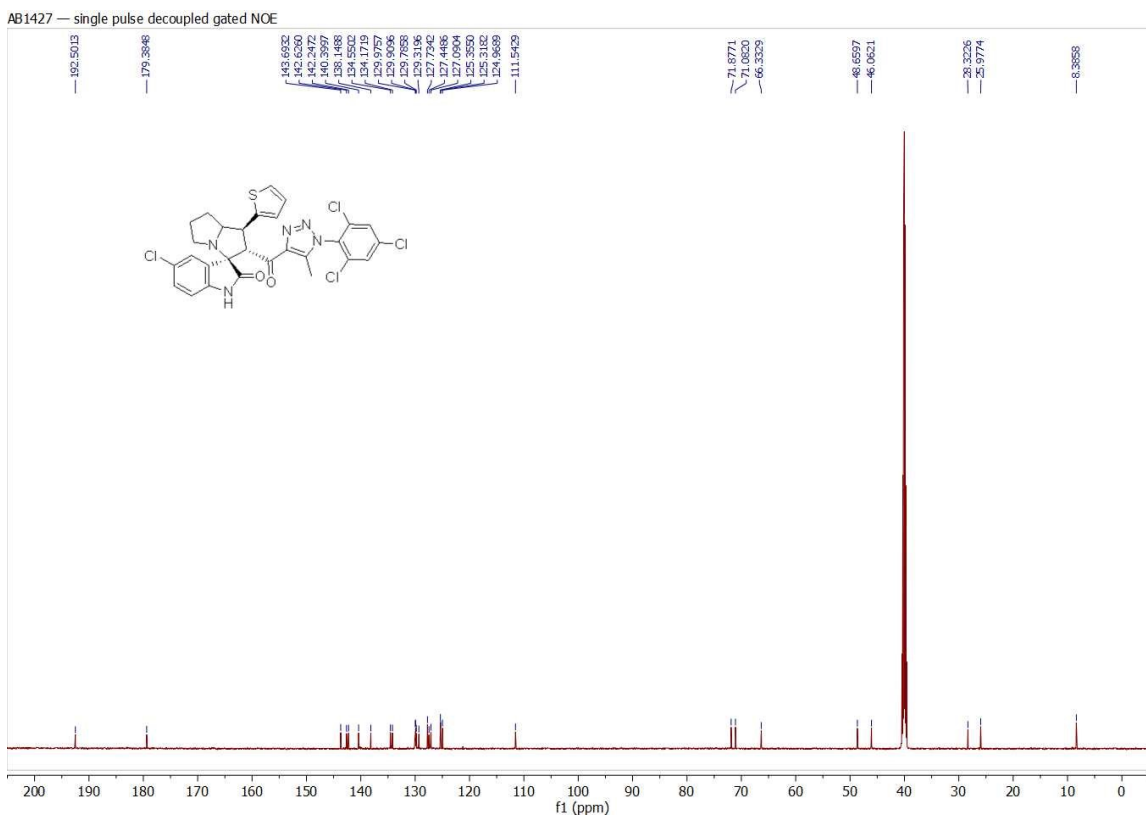

Figure S20:  $^{13}\text{C}$ NMR (DMSO- $d_6$ ) for 4i

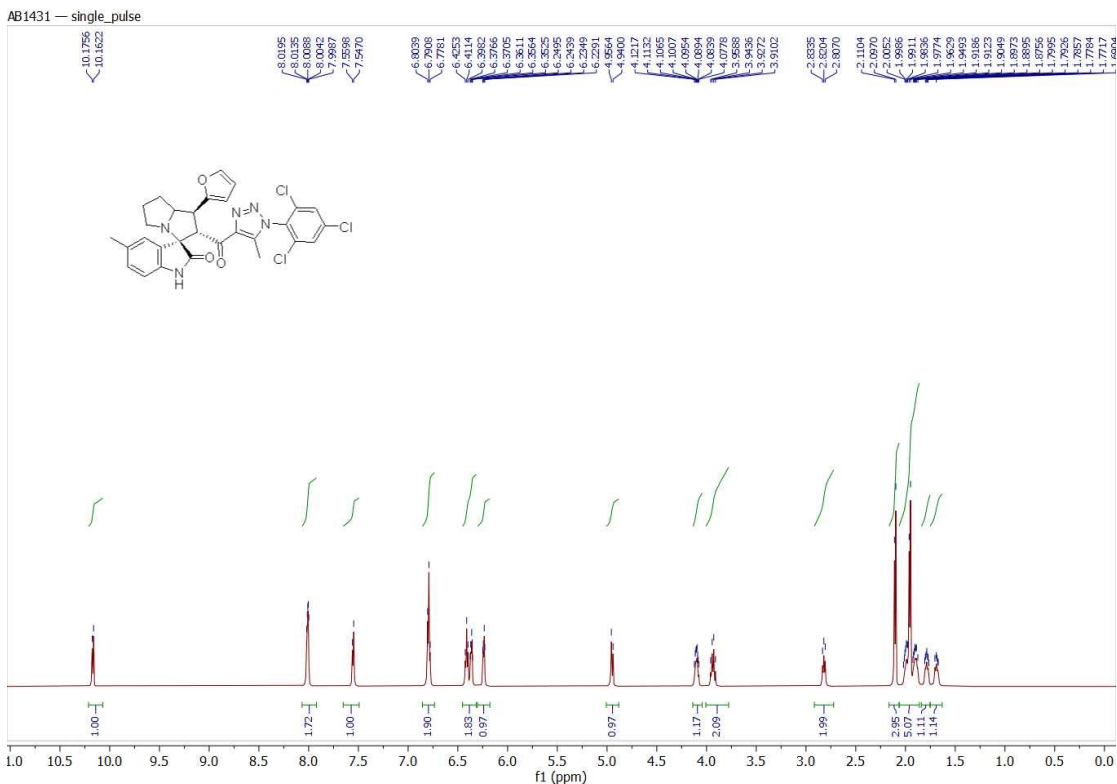

Figure S21:  $^1\text{H}$ NMR (DMSO- $d_6$ ) for **4j**

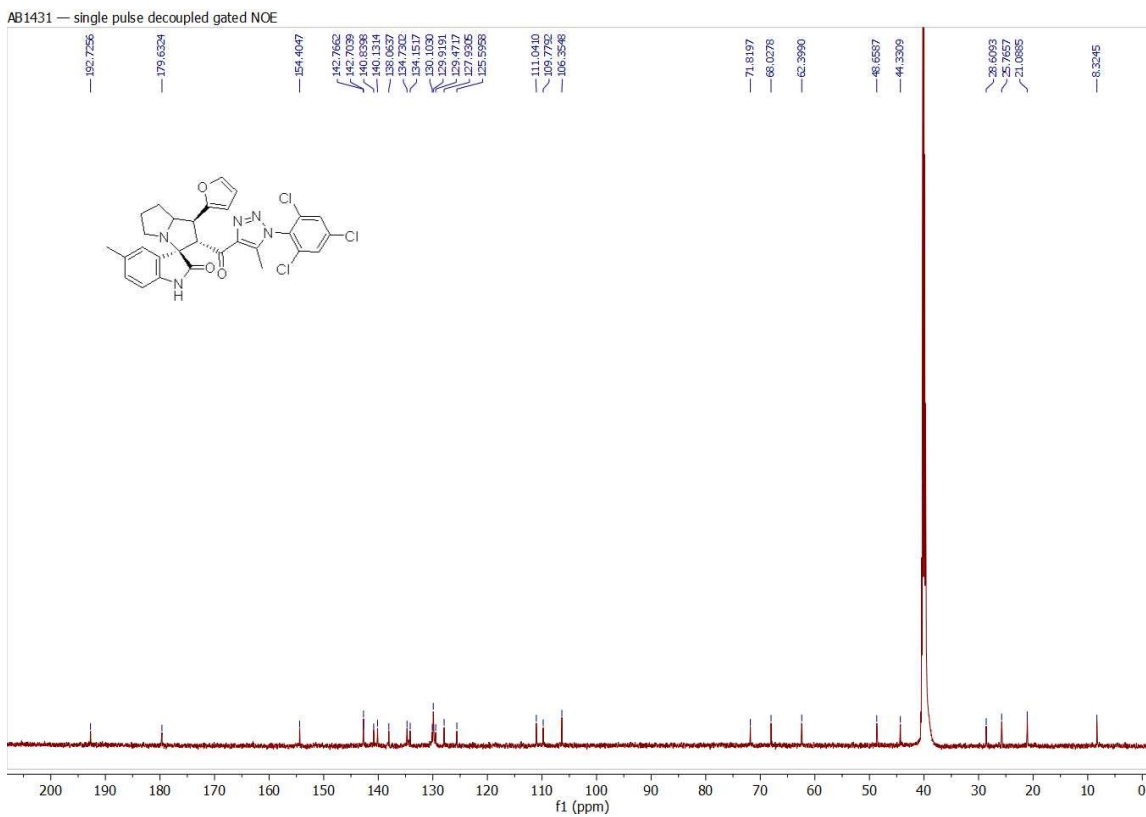

Figure S22:  $^{13}\text{C}$ NMR (DMSO- $d_6$ ) for **4j**

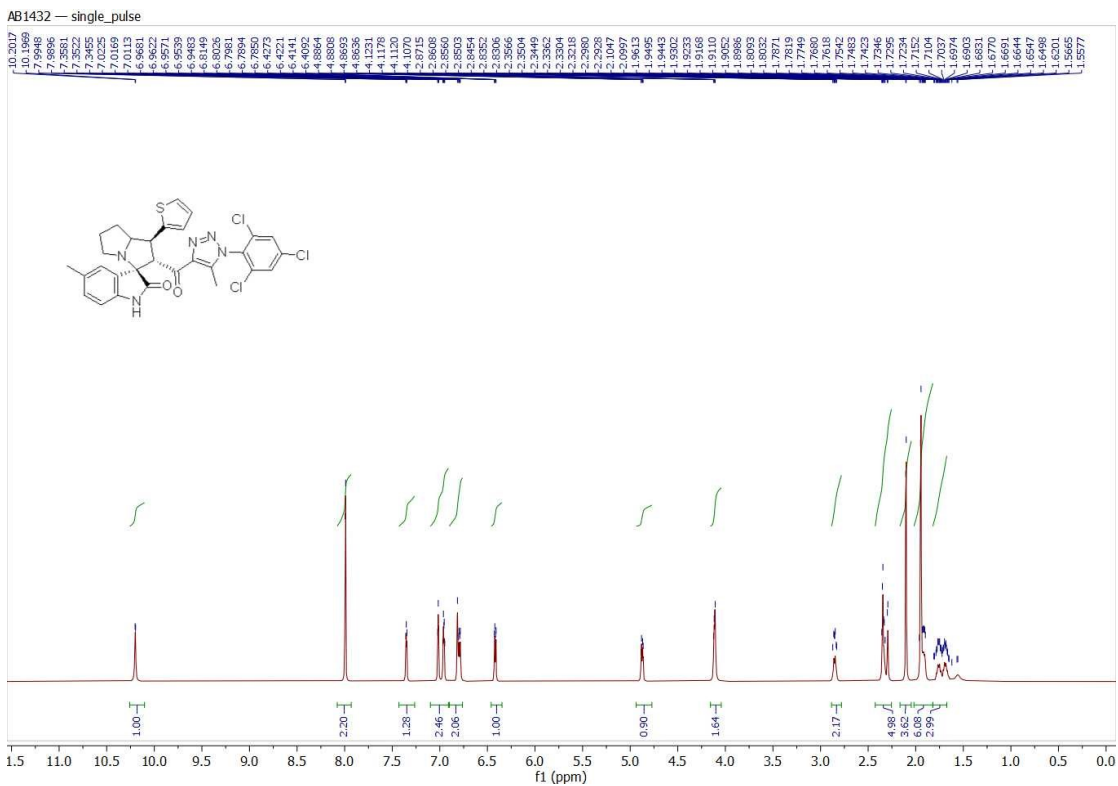

Figure S23:  $^1\text{H}$ NMR (DMSO- $d_6$ ) for 4k

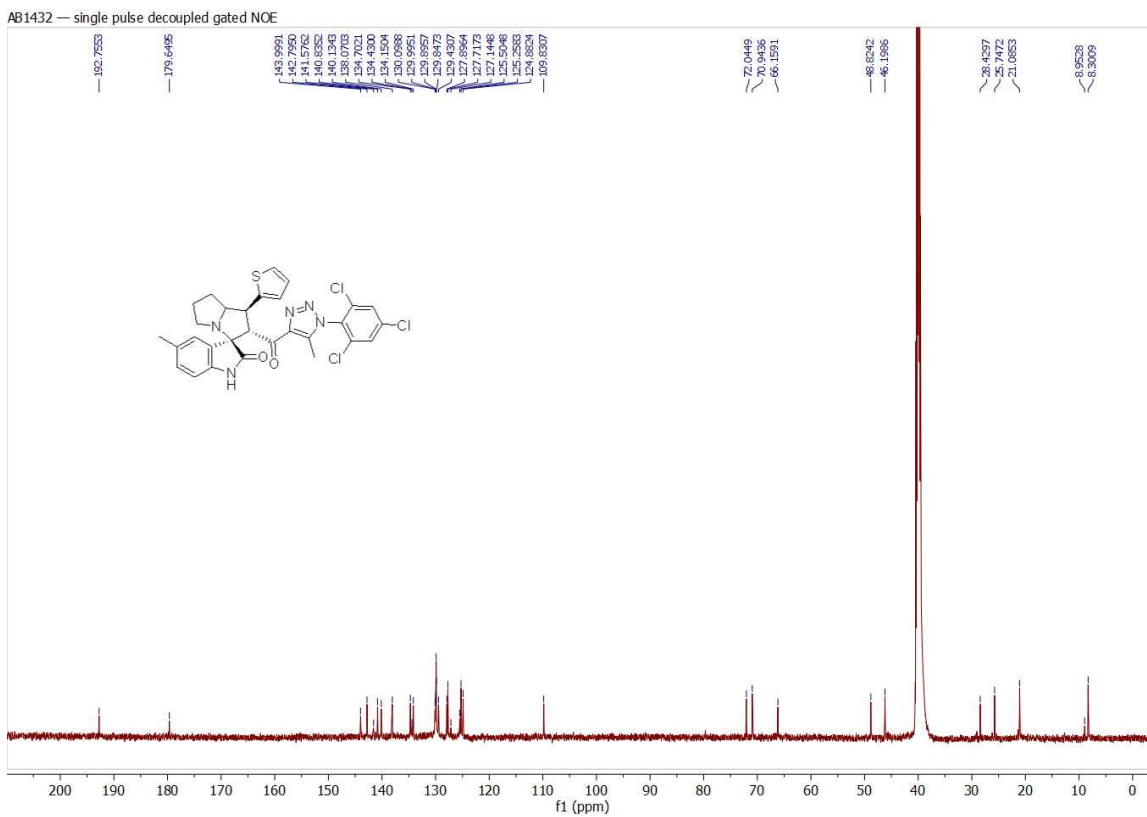

Figure S24:  $^{13}\text{C}$ NMR (DMSO- $d_6$ ) for 4k

**Positive MS Scan 17**

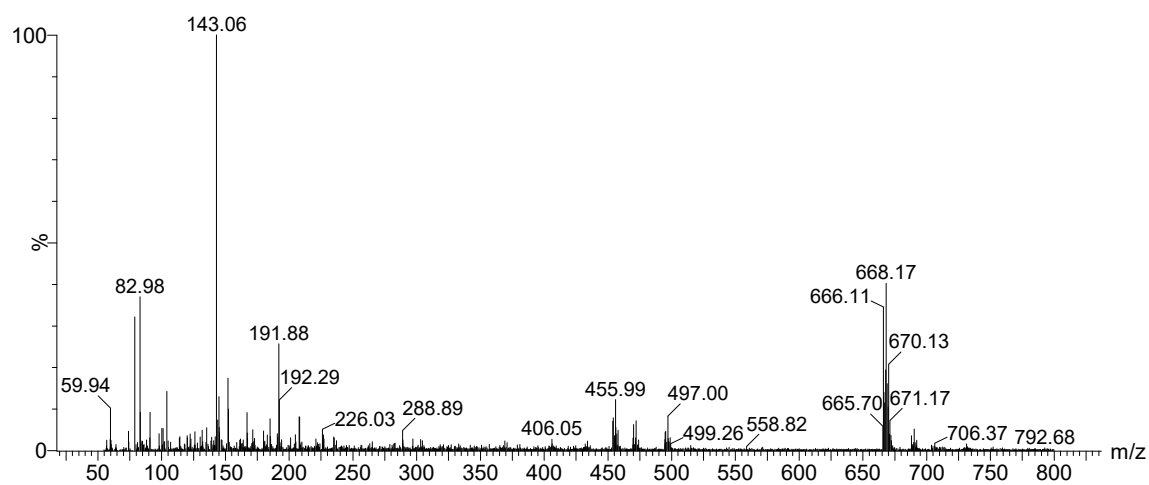

**Figure S25: MS for 4a**

**Positive MS Scan 18**

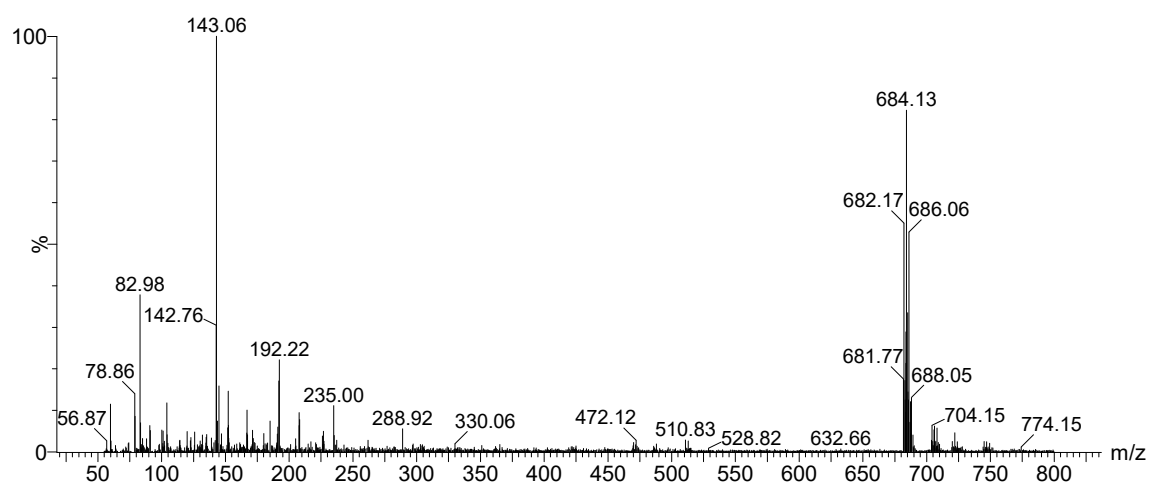

**Figure S26: MS for 4b**



**Positive MS Scan 19**

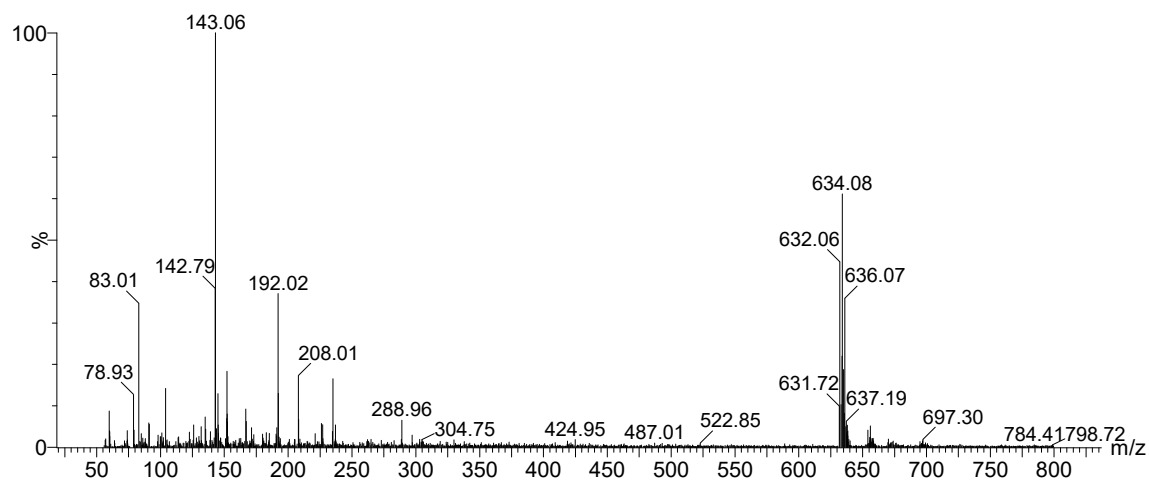

**Figure S27: MS for 4c**

**Positive MS Scan 22**

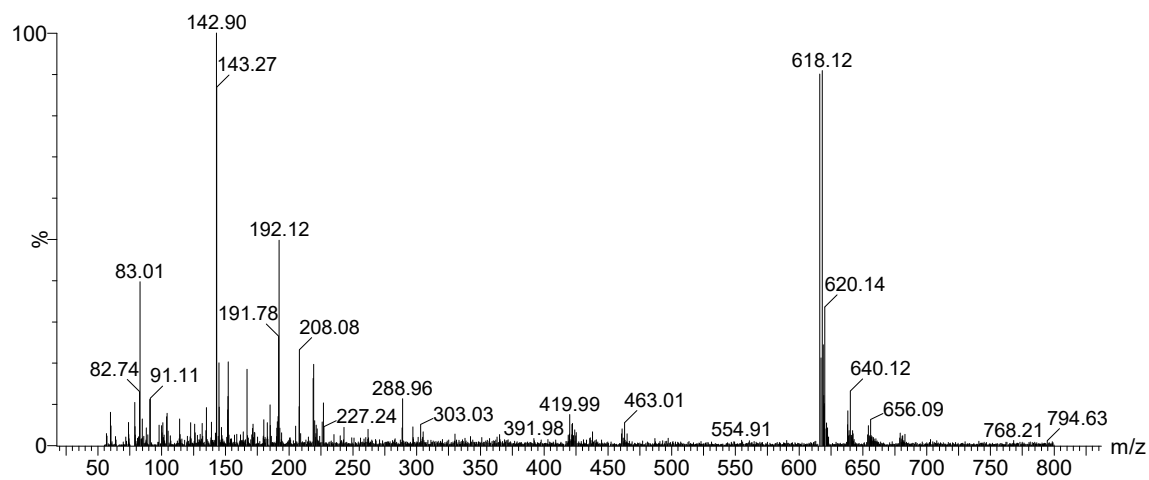

**Figure S28: MS for 4d**

**Positive MS Scan 23**

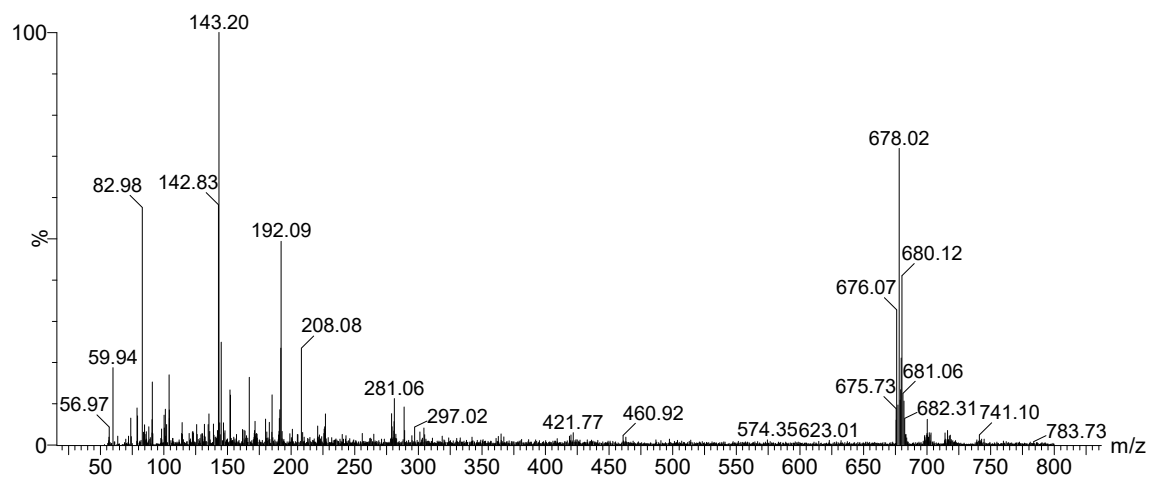

**Figure S29: MS for 4e**

**Positive MS Scan 24**

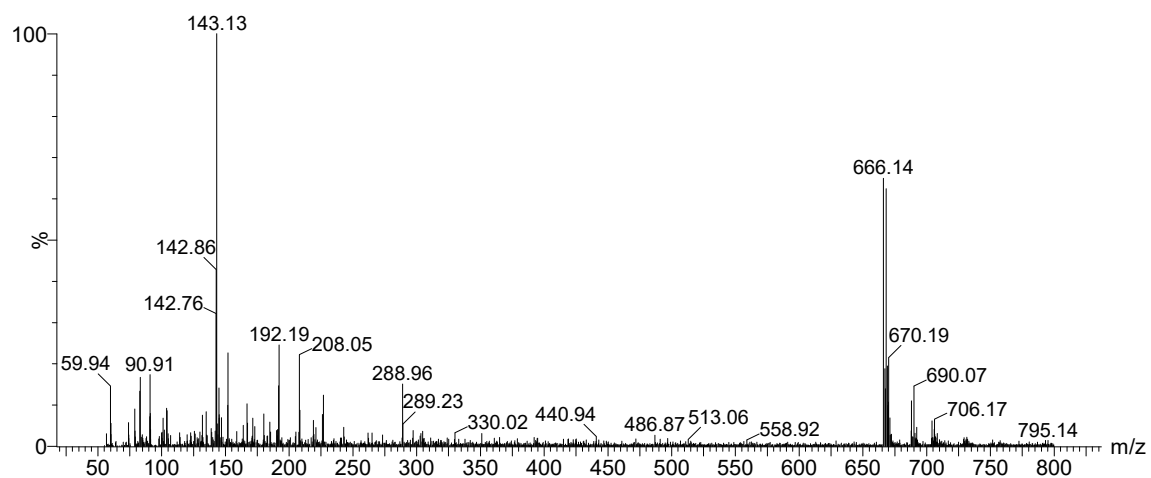

**Figure S30: MS for 4f**

Positive MS Scan 25

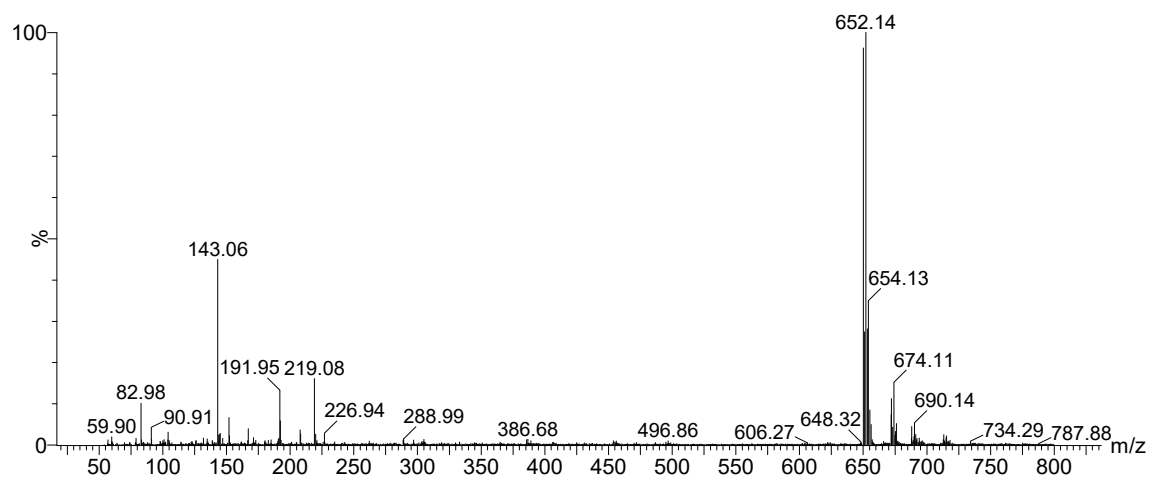

Figure S31: MS for 4g

Positive MS Scan 26

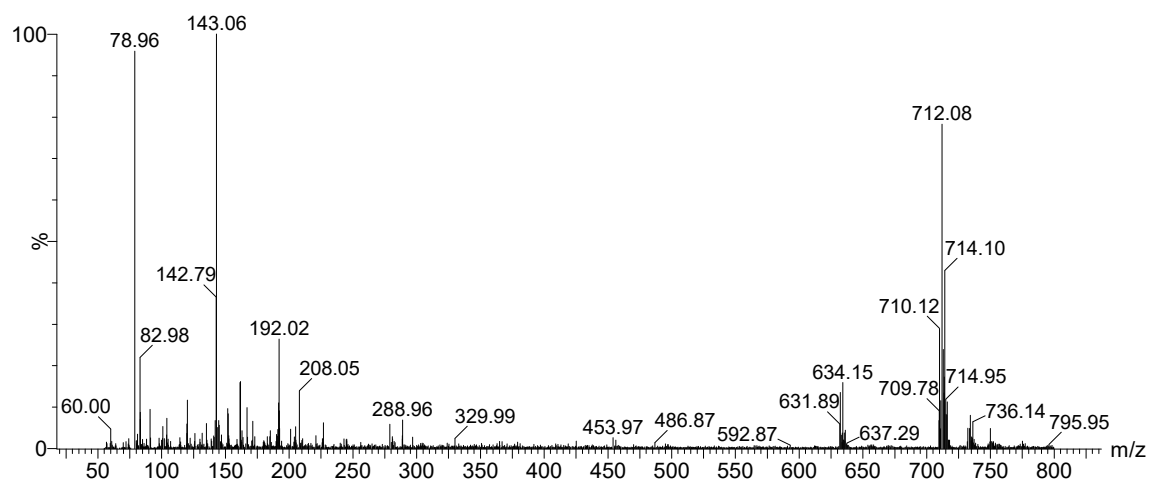

Figure S32: MS for 4h

Positive MS Scan 27

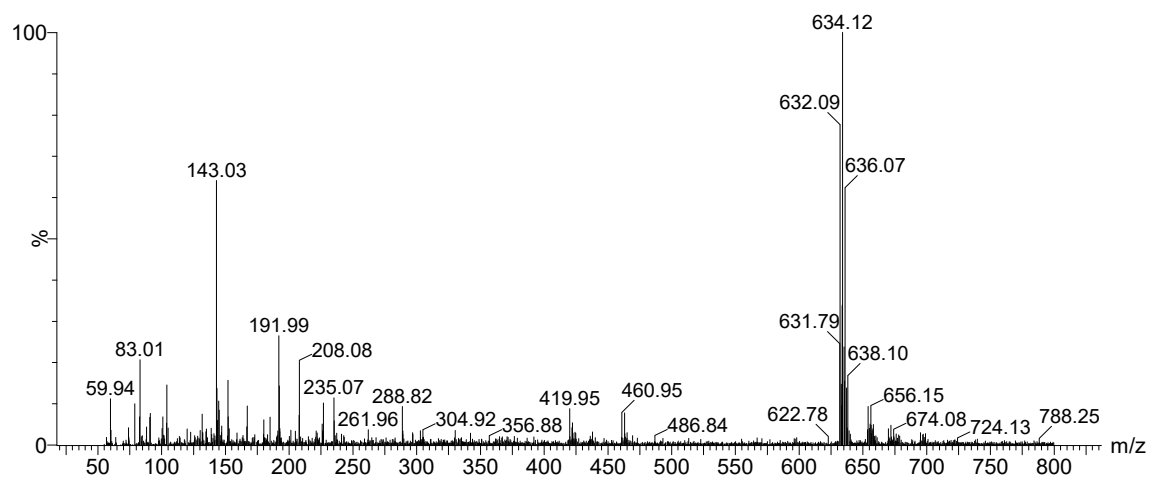

Figure S33: MS for 4i

Positive MS Scan 31

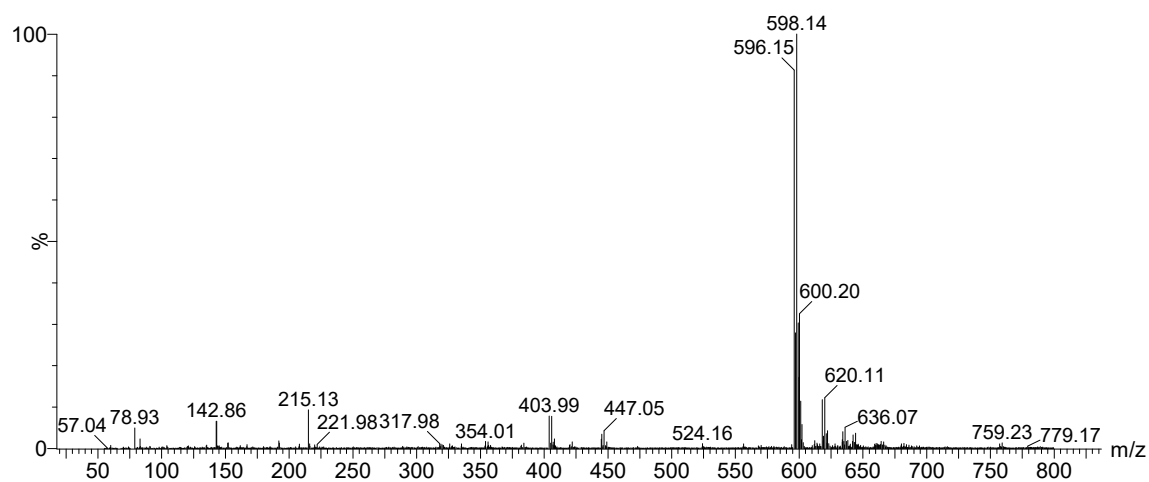

Figure S34: MS for 4j

Positive MS Scan 32

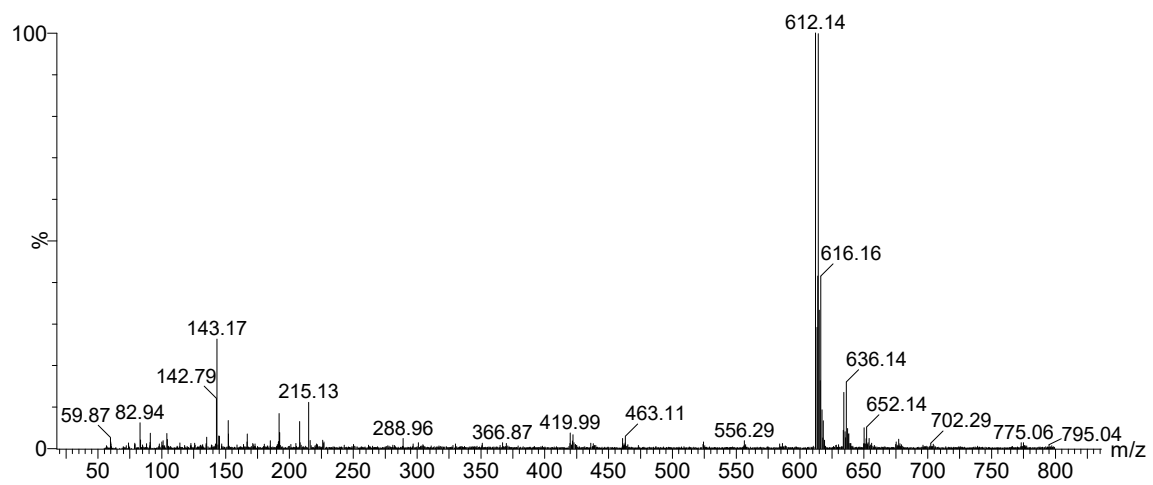

Figure S35: MS for 4k
